# Supplementary material for: Bacterial Endophyte Community Dynamics in Apple (Malus domestica Borkh.) Germplasm and Their Evaluation for Scab Management Strategies
Source: MDPI journal article supplement (doi:10.3390/jof7110923), 2021-10-31
Supplement: s1 [file s1]

Table S1: Details of the surveyed apple germplasm and isolation thereof

| L              | S              | P | P <sub>1</sub> | I                                 | S <sub>v</sub>             | F                                 |
|----------------|----------------|---|----------------|-----------------------------------|----------------------------|-----------------------------------|
| A <sub>2</sub> | R <sub>d</sub> | T | 4.70           | DS1, DS2, DS7                     | DS2                        | NWHA-1                            |
|                |                | L | 5.90           | DS5, DS6                          |                            |                                   |
|                |                | R | 6.12           | DS3, DS4, DS9, DS8                | DS4                        | NWHA-2                            |
|                | G <sub>d</sub> | T | 5.67           | DS10, DS13, DS15, DS11, DS12      | DS10, DS15, DS11           | NWHA-3, WHA-4, NWHA-5             |
|                |                | L | 5.97           | DS14, DS16, DS19                  | DS14, DS16, DS19           | NWHA-6 NWHA-7 NWHA-8              |
|                |                | R | 7.27           | DS17, DS18, DS20, DS23, DS24      | DS17, DS18, DS23           | NWHA-9, NWHA-10 NWHA-11           |
|                | R <sub>c</sub> | T | 6.31           | DS21,DS22, DS25                   | DS25                       | NWHA-12                           |
|                |                | L | 6.02           | DS26, DS29                        |                            |                                   |
|                |                | R | 6.89           | DS28, DS30,DS31                   | DS31                       | NWHA-13                           |
|                | G <sub>r</sub> | T | 6.33           | DS27,DS32,DS35                    | DS35                       | NWHA-14                           |
|                |                | L | 5.49           | DS34,DS37,DS38                    | DS33                       | NWHA-15                           |
|                |                | R | 6.55           | DS33, DS36,DS39                   |                            |                                   |
|                | F <sub>2</sub> | T | 5.07           | DS41,DS42, DS45                   | DS45                       | NWHA-16                           |
|                |                | L | 6.19           | DS40                              |                            |                                   |
|                |                | R | 7.12           | DS43, DS44,DS46                   |                            |                                   |
|                | M <sub>j</sub> | T | 6.32           | DS49,DS51                         | DS51                       | NWHA-17                           |
|                |                | L | 7.83           | DS48, DS53                        | DS48, DS53                 | NWHA-18, NWHA-19                  |
|                |                | R | 8.27           | DS47,DS50                         | DS50                       | NWHA-20                           |
| P <sub>1</sub> | R <sub>v</sub> | T | 5.36           | DS52, DS57                        | DS57, DS54                 | NWHA-21, NWHA-22                  |
|                |                | L | 5.72           | DS56,DS55                         |                            |                                   |
|                |                | R | 7.42           | DS54                              |                            |                                   |
|                | G <sub>m</sub> | T | 5.38           | DS59,DS61                         | DS60                       | NWHA-23                           |
|                |                | L | 5.89           | DS57,DS60                         |                            |                                   |
|                |                | R | 6.39           | DS58,                             |                            |                                   |
|                | M <sub>b</sub> | T | 6.48           | DS63,DS71, DS75                   | DS63, DS71, DS75           | NWHA-24,NWHA-25, NWHA-26          |
|                |                | L | 7.29           | DS67,DS72, DS74                   | DS74                       | NWHA-27                           |
|                |                | R | 7.88           | DS64,DS66,DS73                    | DS66, DS73                 | NWHA-28,NWHA-29                   |
|                | G <sub>d</sub> | T | 5.39           | DS69, DS76                        | DS76                       | NWHA-30                           |
|                |                | L | 5.35           | DS65, DS68                        |                            |                                   |
|                |                | R | 6.44           | DS62, DS70,DS77                   | DS77                       | NWHA-31                           |
|                | S <sub>r</sub> | T | 4.78           | DS79, DS83                        | DS81                       | NWHA-32                           |
|                |                | L | 5.41           | DS82, DS81                        |                            |                                   |
|                |                | R | 5.84           | DS80, DS84,DS78                   | DS78                       | NWHA-33                           |
|                | R <sub>f</sub> | T | 5.11           | DS84, DS85, DS90                  | DS90                       | NWHA-34                           |
|                |                | L | 5.65           | DS87, DS88                        | DS88                       | NWHA-35                           |
|                |                | R | 7.06           | DS86, DS89, DS91                  |                            |                                   |
| B <sub>1</sub> | P <sub>s</sub> | T | 6.48           | DS93, DS97                        | DS93                       | NWHA-36                           |
|                |                | L | 6.09           | DS95,DS98, DS99                   | DS95, DS99                 | NWHA-37, NWHA-38                  |
|                |                | R | 7.51           | DS92, DS94, DS96, DS100           | DS92, DS94, DS100          | NWHA-39, NWHA-40, NWHA-41         |
|                | O <sub>s</sub> | T | 5.19           | DS102, DS104, DS106               | DS106, DS101               | NWHA-42, NWHA-43                  |
|                |                | L | 5.92           | DS105, DS107                      |                            |                                   |
|                |                | R | 6.38           | DS101, DS103                      |                            |                                   |
|                | G <sub>v</sub> | T | 5.29           | DS108, DS114                      | DS113, DS111, DS115        | NWHA-44, NWHA-45, NWHA-46         |
|                |                | L | 6.71           | DS112, DS113,                     |                            |                                   |
|                |                | R | 6.68           | DS109, DS110, DS111, DS115        |                            |                                   |
|                | L <sub>c</sub> | T | 6.05           | DS116, DS121, DS124               | DS116, DS124               | NWHA-47, NWHA-48                  |
|                |                | L | 6.39           | DS119, DS120                      | DS119, DS120               | NWHA-49, NWHA-50                  |
|                |                | R | 7.28           | DS117, DS123, DS118,DS122         | DS117, DS122               | NWHA-51, NWHA-52                  |
|                | M <sub>n</sub> | T | 6.11           | DS127, DS128, DS133, DS134        | DS128, DS133, DS134        | NWHA-53, NWHA-54, NWHA-55         |
|                |                | L | 5.89           | DS130, DS131                      | DS130                      | NWHA-56                           |
|                |                | R | 7.69           | DS125, DS126, DS129, DS132        | DS125, DS129, DS132        | NWHA-57, NWHA-58, NWHA-59         |
|                | F <sub>n</sub> | T | 7.21           | DS135, DS143, DS144               | DS135, DS144               | NWHA-60,NWHA-61                   |
|                |                | L | 6.11           | DS137, DS139, DS140               | DS137, DS140               | NWHA-62,NWHA-63                   |
|                |                | R | 7.96           | DS136, DS138, DS141, DS142, DS145 | DS136, DS141, DS142, DS145 | NWHA-64, NWHA-65 NWHA-66, NWHA-67 |
| S <sub>p</sub> | A <sub>b</sub> | T | 5.67           | DS146, DS148, DS152               | DS152                      | NWHA-68                           |
|                |                | L | 6.49           | DS149, DS150, DS154, DS155        | DS149, DS155               | NWHA-69, NWHA-70                  |
|                |                | R | 6.87           | DS147, DS151, DS153               | DS147                      | NWHA-71                           |

**\*\*L:Location;S: Sampling variety/cultivar; P: Plant part;P<sub>1</sub> :Population Log<sub>10</sub> ×10<sup>5</sup> CFU/mL; I: Isolated strains; S<sub>v</sub>:Strains with antifungal behavior; F: Final code of isolate; A<sub>g</sub>: Anantnag; P<sub>1</sub>: Pulwama; B<sub>1</sub>: Baramula; S<sub>n</sub>:Shopian; R<sub>d</sub>:Red delicious; G<sub>d</sub>: Golden delicious; R<sub>c</sub>:Red chief; G<sub>r</sub>: Gala Redlum; F<sub>2</sub>: Fuji Zehn Aztech; M<sub>j</sub>: Maharaji; R<sub>v</sub>: Red velox; G<sub>m</sub>: Gala mast; M<sub>b</sub>: Malus floribunda; S<sub>r</sub>: Summer red; R<sub>f</sub>: Red fuji; P<sub>s</sub>: Priscella; O<sub>s</sub>: Oregon spur; G<sub>v</sub>:Gavin; L<sub>c</sub>: Lal cider; M<sub>n</sub>:Manchurian; F<sub>n</sub>:Fenna; A<sub>b</sub>:Ambri; T:Twigs;L:Leaf; R:Root**

**Table S2.** Details of the sequenced microflora with antifungal behavior against *Venturia inaequalis*

| Isolate | Bacterial species                                                        | Accession number | Max. Identity       |
|---------|--------------------------------------------------------------------------|------------------|---------------------|
| NWHA-1  | <i>Bacillus aryabhatai</i> strain DST scab                               | MH718825         | 1533/1533, (100%)   |
| NWHA-2  | <i>Pseudomonas veronii</i> strain DST scab2                              | MH718842         | 1520/1521, (99%)    |
| NWHA-3  | <i>Bacillus cereus</i> strain DST scab3                                  | MH725572         | 1563/1563, (100%)   |
| NWHA-4  | <i>Bacillus amyloliquefaciens</i> strain DST scab4                       | MH725637         | 1553/1553, (100%)   |
| NWHA-5  | <i>Bacillus siamensis</i> strain DST scab5                               | MH732922         | 1533/1533, (100%)   |
| NWHA-6  | <i>Bacillus amyloliquefaciens</i> strain DST scab6                       | MH732929         | 1557/1557, (100%)   |
| NWHA-7  | <i>Bacillus velezensis</i> strain DST scab7                              | MH734811         | 1560/1560, (100%)   |
| NWHA-8  | <i>Bacillus siamensis</i> strain DST scab8                               | MH734812         | 1524/1524, (100%)   |
| NWHA-9  | <i>Bacillus aryabhatai</i> strain DST scab9                              | MT150705         | 1533/1533, (100%)   |
| NWHA-10 | <i>Bacillus subtilis</i> strain DST10                                    | MT150715         | 1543/1543, (100%)   |
| NWHA-11 | <i>Ochrobactrum pecoris</i> strain DST11                                 | MT750122         | 1399/1399, (100%)   |
| NWHA-12 | <i>Paenibacillus amylolyticus</i> strain DST12                           | MT154258         | 1511/1511, (100%)   |
| NWHA-13 | <i>Paenibacillus tundrae</i> strain DST13                                | MT158221         | 1526/1526, (100%)   |
| NWHA-14 | <i>Paenibacillus xylanexedens</i> strain DST14                           | MT154260         | 1526/1526, (100%)   |
| NWHA-15 | <i>Rahnella aquatilis</i> strain DST15                                   | MT154261         | 1505/1505, (100%)   |
| NWHA-16 | <i>Pseudomonas mosselii</i> strain DST16                                 | MT154264         | 1430/1430, (100%)   |
| NWHA-17 | <i>Sphingomonas wittichii</i> strain DST17                               | MT165895         | 1498/1498, (100%)   |
| NWHA-18 | <i>Variovorax boronicumulans</i> strain DST18                            | MT163368         | 1483/1483, (100%)   |
| NWHA-19 | <i>Rhizorhabdus dicambivorans</i> strain DST19                           | MT163374         | 1470/1470, (100%)   |
| NWHA-20 | <i>Ramlibacter ginsenosidimutans</i> strain DST20                        | MT163375         | 1470/1470, (100%)   |
| NWHA-21 | <i>Pseudomonas veronii</i> strain DST21                                  | MT166342         | 1503/1503, (100%)   |
| NWHA-22 | <i>Pseudomonas fluorescens</i> strain DST22                              | MT163392         | 1512/1515, (99.99%) |
| NWHA-23 | <i>Pantoea agglomerans</i> strain DST23                                  | MT176480         | 1503/1503, (100%)   |
| NWHA-24 | <i>Povalibacter uvarum</i> strain DST24                                  | MT163394         | 1507/1508, (99.99%) |
| NWHA-25 | <i>Enterobacter hormaechei</i> subsp. <i>xiangfangensis</i> strain DST25 | MT163395         | 1500/1500, (100%)   |
| NWHA-26 | <i>Bacillus foraminis</i> strain DST26                                   | MT176179         | 1533/1534, (99.99%) |
| NWHA-27 | <i>Pseudomonas chlororaphis</i> strain DST27                             | MT163397         | 1365/1365, (100%)   |
| NWHA-28 | <i>Pseudomonas psychrophila</i> strain DST28                             | MT163428         | 1537/1537, (100%)   |
| NWHA-29 | <i>Pseudomonas fragi</i> strain DST29                                    | MT176180         | 1458/1462, (99.99%) |
| NWHA-30 | <i>Bacillus flexus</i> strain DST30                                      | MT163343         | 1500/1500, (100%)   |
| NWHA-31 | <i>Paenibacillus lautus</i> strain DST31                                 | MT163448         | 1499/1499, (100%)   |
| NWHA-32 | <i>Paenibacillus peoriae</i> strain DST32                                | MT163453         | 1515/1515, (100%)   |
| NWHA-33 | <i>Bacillus subtterraneus</i> strain DST33                               | MT163452         | 1522/1522, (100%)   |
| NWHA-34 | <i>Paenibacillus polymyxa</i> strain DST34                               | MT163461         | 1519/1519, (100%)   |
| NWHA-35 | <i>Enterobacter cloacae</i> strain DST35                                 | MT163464         | 1481/1481, (100%)   |
| NWHA-36 | <i>Klebsiella pneumoniae</i> strain DST36                                | MT163466         | 1498/1498, (100%)   |
| NWHA-37 | <i>Cedecea neteri</i> strain DST37                                       | MT176181         | 1463/1465, (99.99%) |
| NWHA-38 | <i>Enterobacter cloacae</i> strain DST338                                | MT176765         | 1516/1516, (100%)   |
| NWHA-39 | <i>Leclercia adecarboxylata</i> strain DST39                             | MT176482         | 1449/1449, (100%)   |
| NWHA-40 | <i>Enterobacter ludwigii</i> strain DST40                                | MT176481         | 1454/1454, (100%)   |
| NWHA-41 | <i>Bacillus amyloliquefaciens</i> strain DST41                           | MT176484         | 1473/1473, (100%)   |
| NWHA-42 | <i>Bacillus velezensis</i> strain DST42                                  | MT176485         | 1380/1380, (100%)   |
| NWHA-43 | <i>Pseudomonas synxantha</i> strain DST43                                | MT176487         | 1245/1249, (99.99%) |
| NWHA-44 | <i>Pseudomonas libanensis</i> strain DST44                               | MT176512         | 1518/1518, (100%)   |
| NWHA-45 | <i>Pseudomonas libanensis</i> strain DST45                               | MT176513         | 1516/1516, (100%)   |
| NWHA-46 | <i>Bacillus amyloliquefaciens</i> strain DST46                           | MT176523         | 1427/1427, (100%)   |
| NWHA-47 | <i>Pseudomonas grimontii</i> strain DST47                                | MT176524         | 1470/1472, (99.99%) |
| NWHA-48 | <i>Bacillus siamensis</i> Strain DST48                                   | MT176526         | 1467/1467, (100%)   |
| NWHA-49 | <i>Bacillus amyloliquefaciens</i> strain DST49                           | MT176527         | 1509/1509, (100%)   |
| NWHA-50 | <i>Bacillus subtilis</i> strain DST50                                    | MT176530         | 1499/1499, (100%)   |
| NWHA-51 | <i>Curvibacter gracilis</i> strain DST51                                 | MT254903         | 1484/1484, (100%)   |
| NWHA-52 | <i>Delftia acidovorans</i> strain DST52                                  | MT254906         | 1515/1515, (100%)   |
| NWHA-53 | <i>Enterobacter asburiae</i> strain DST53                                | MT180564         | 1406/1408, (99.99%) |
| NWHA-54 | <i>Enterobacter ludwigii</i> strain DST54                                | MT180566         | 1492/1492, (100%)   |
| NWHA-55 | <i>Salinivibrio costicola</i> strain DST55                               | MT180567         | 1483/1487, (99.99%) |
| NWHA-56 | <i>Vibrionaceae bacterium</i> strain DST56                               | MT180709         | 1466/1466, (100%)   |
| NWHA-57 | <i>Leclercia adecarboxylata</i> strain DST57                             | MT180610         | 1514/1514, (100%)   |
| NWHA-58 | <i>Enterobacter asburiae</i> strain DST58                                | MT180710         | 1424/1424, (100%)   |
| NWHA-59 | <i>Ochrobactrum pecoris</i> strain DST59                                 | MT180711         | 1389/1389, (100%)   |

|         |                                                  |          |                   |
|---------|--------------------------------------------------|----------|-------------------|
| NWHA-60 | <i>Ochrobactrum tritici</i> strain DST60         | MT180712 | 1474/1474, (100%) |
| NWHA-61 | <i>Ochrobactrum anthropi</i> strain DST61        | MT180723 | 1445/1445, (100%) |
| NWHA-62 | <i>Rahnella aquatilis</i> strain DST62           | MT180745 | 1472/1474, (100%) |
| NWHA-63 | <i>Curtobacterium herbarum</i> strain DST63      | MT186202 | 1492/1492, (100%) |
| NWHA-64 | <i>Pseudomonas libanensis</i> strain DST64       | MT271984 | 1518/1518, (100%) |
| NWHA-65 | <i>Bacillus simplex</i> strain DST65             | MT186229 | 1525/1525, (100%) |
| NWHA-66 | <i>Glutamicibacter endophyticus</i> strain DST66 | MT186238 | 1583/1583, (100%) |
| NWHA-67 | <i>Glutamicibacter halophytocola</i> strain ST67 | MT186239 | 1524/1524, (100%) |
| NWHA-68 | <i>Comamonas terrigena</i> strain DST68          | MT186246 | 1466/1466, (100%) |
| NWHA-69 | <i>Delftia acidovorans</i> strain DST69          | MT186247 | 1509/1509, (100%) |
| NWHA-70 | <i>Micrococcus yunnanensis</i> strain DST70      | MT186248 | 1493/1493, (100%) |
| NWHA-71 | <i>Pseudomonas fluorescens</i> strain DST71      | MT186249 | 1470/1470, (100%) |
